# Supplementary material for: Litchi-peel-like hierarchical hollow copper-ceria microspheres: aerosol-assisted synthesis and high activity and stability for catalytic CO oxidation
Source: Royal Society of Chemistry journal article supplement (doi:10.1039/c8nr04642e), 2018-01-01
Supplement: c8nr04642e1.pdf [file c8nr04642e1.pdf]

## Litchi-peel-like hierarchical hollow copper-ceria microspheres: aerosol-assisted synthesis and high activity and stability for catalytic CO oxidation

Wenge Li, Yanjie Hu,\* Hao Jiang, Nan Jiang, Wei Bi and Chunzhong Li\*

Key Laboratory for Ultrafine Materials of the Ministry of Education, School of Materials Science and Engineering, East China University of Science & Technology, Shanghai 200237, China.

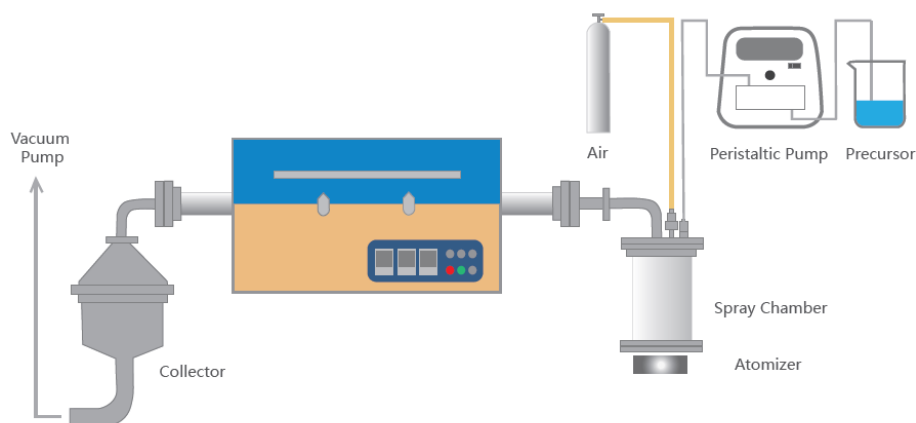

Figure S1 Schematic setup for aerosol spray pyrolysis.

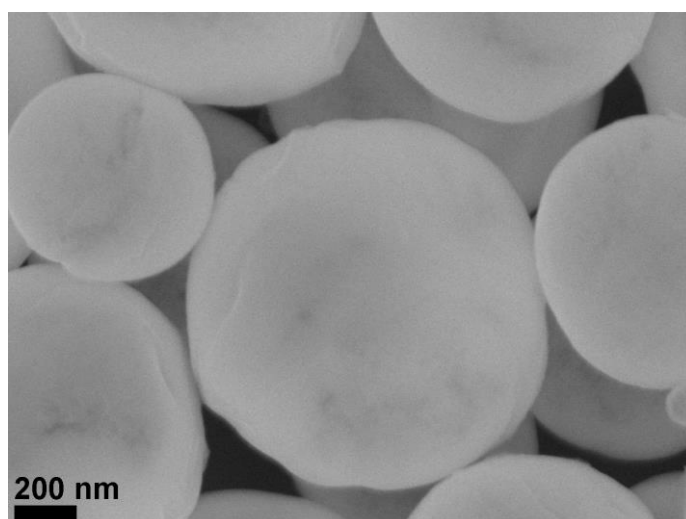

Figure S2 Enlarged SEM image of 20CuCe-H sample.

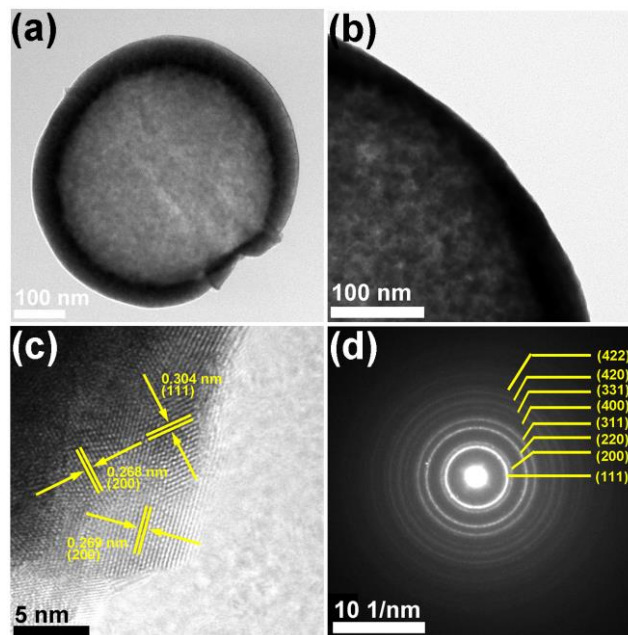

Figure S3 (a) BF-HAADF TEM image, (b) TEM image and (c) HRTEM image of 20CuCe-H, and (d) selected SAED image of the single microsphere in (a).

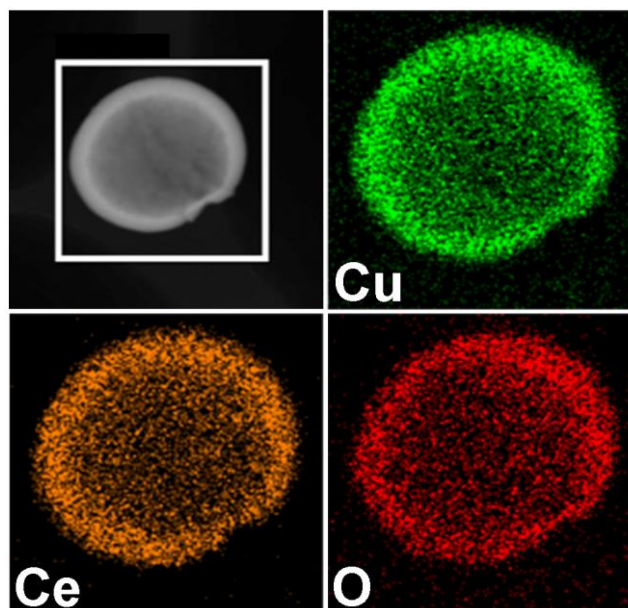

Figure S4 EXD elemental mapping of 20CuCe-H sample.

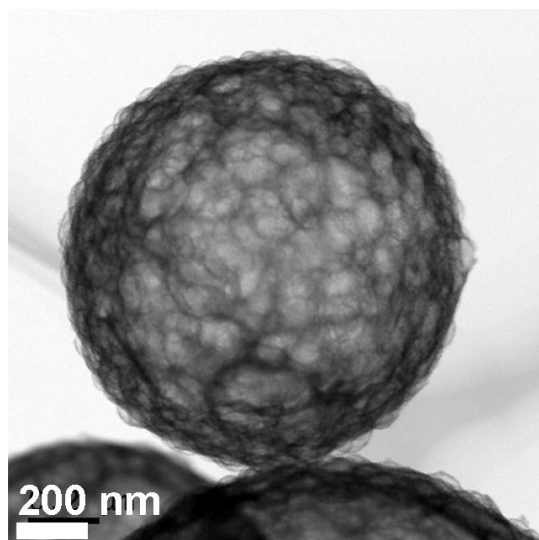

Figure S5 BE-STEM image of 20CuCe-L sample.

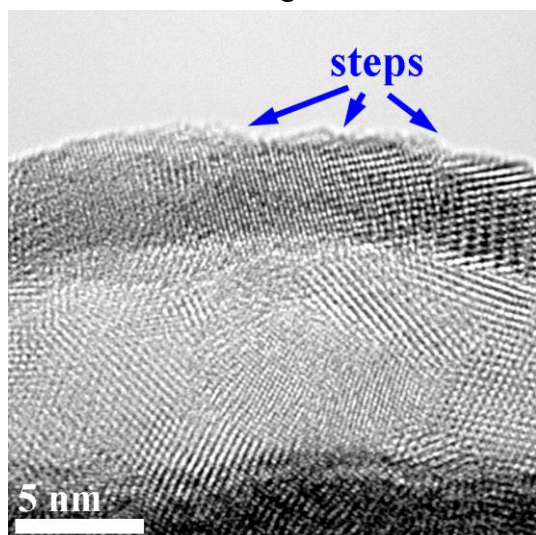

Figure S6 HRTEM image of 20CuCe-L sample.

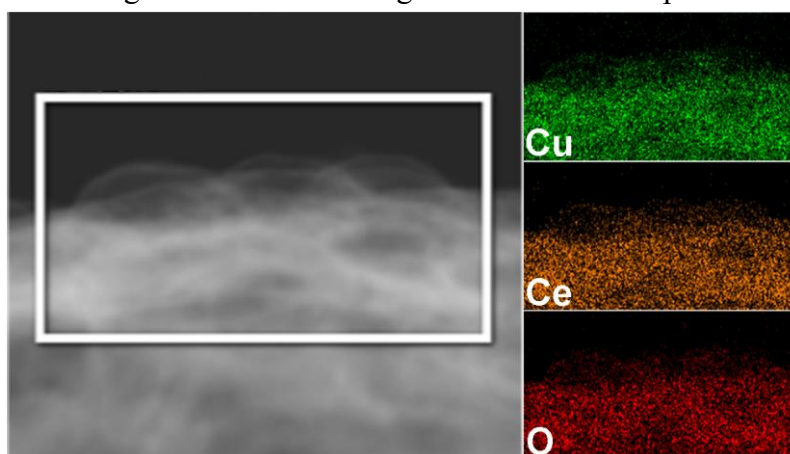

Figure S7 Selected area EDX elementary mapping of 20CuCe-L sample.

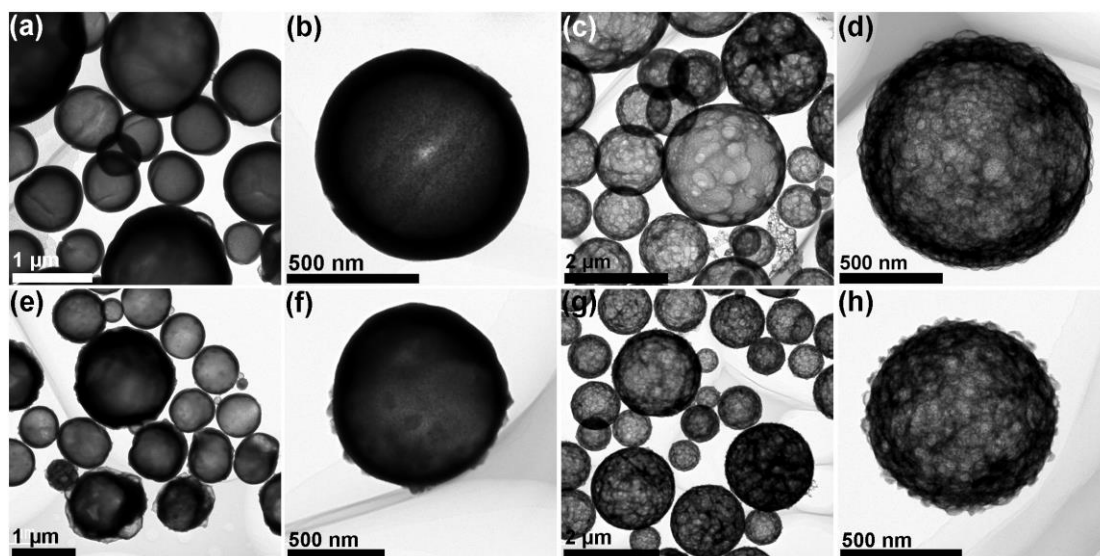

Figure S8 TEM images of (a, b) 10CuCe-H, (c, d) 10CuCe-L, (e, f) 30CuCe-H, (g, h) 30CuCe-L.

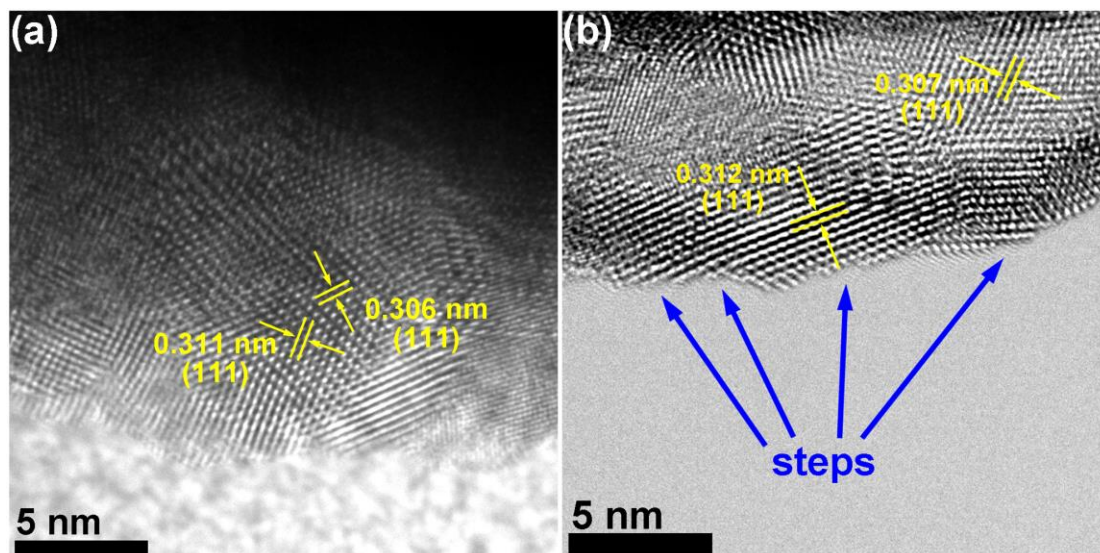

Figure S9 HRTEM images of (a) 10CuCe-H and (b) 10CuCe-L.

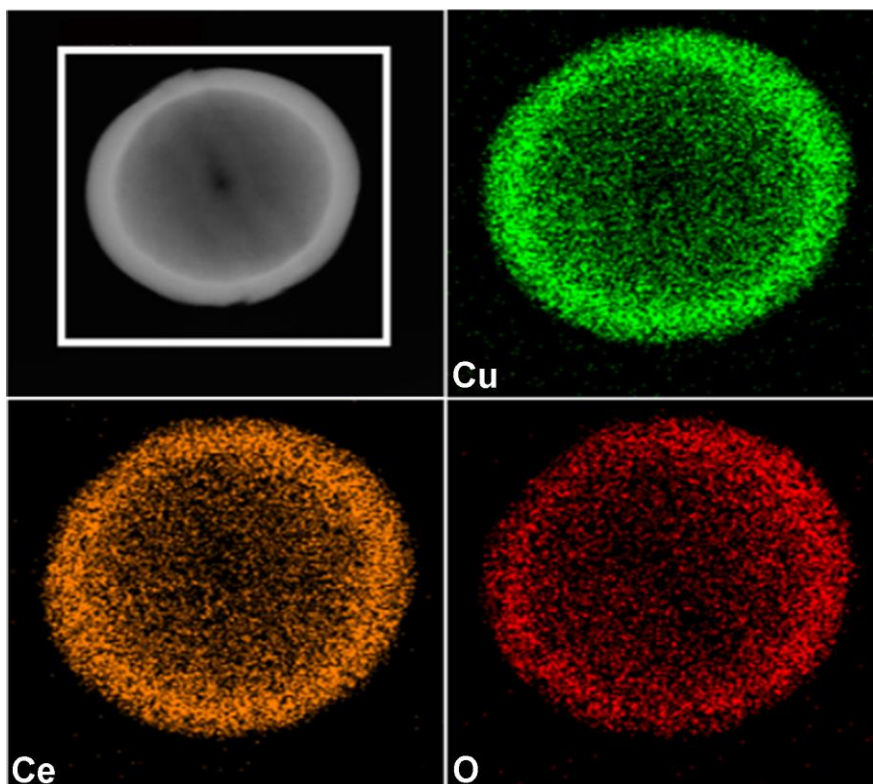

Figure S10 EDX elementary mapping of 10CuCe-H sample.

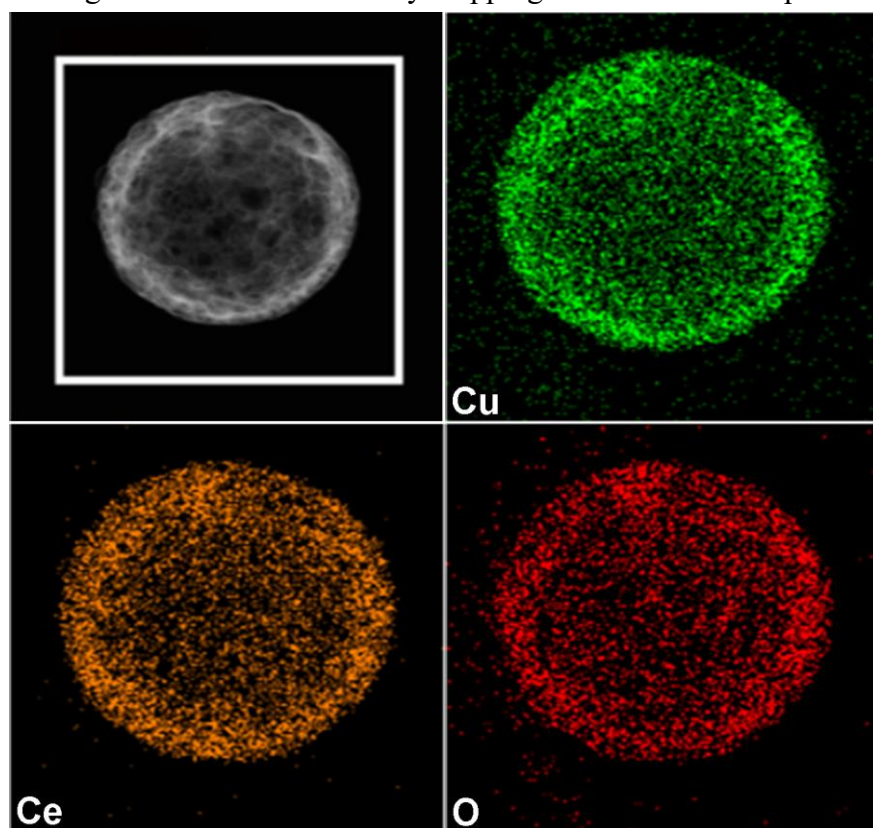

Figure S11 EDX elementary mapping of 10CuCe-L sample.

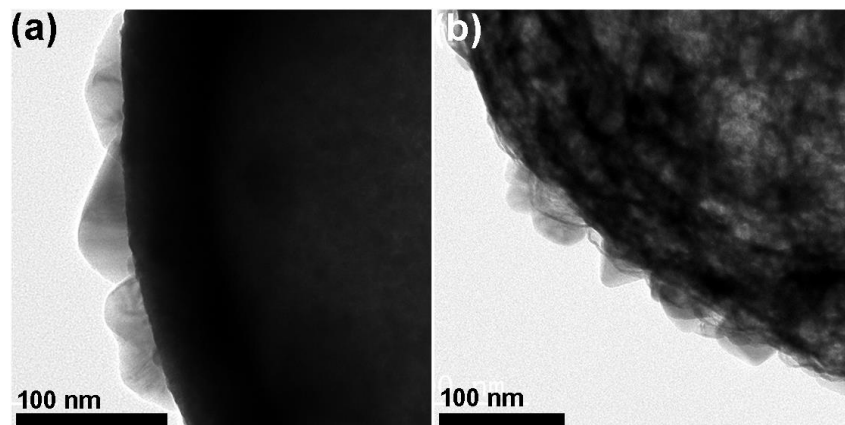

Figure S12 Magnifying TEM images of (a) 30CuCe-H and (b) 30CuCe-L.

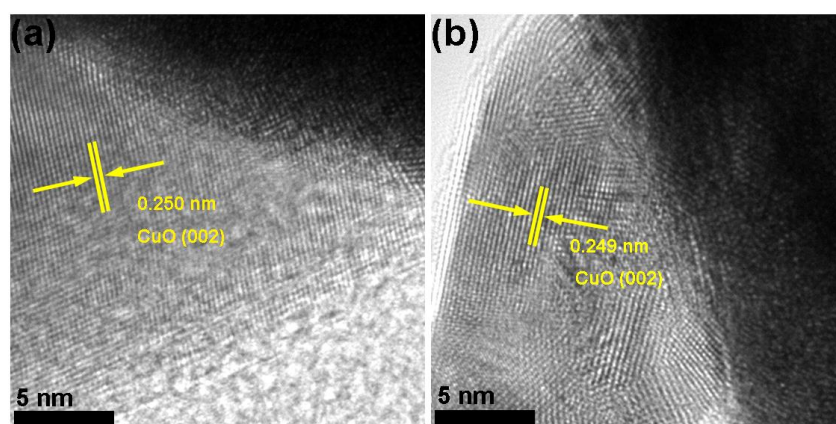

Figure S13 HRTEM images of (a) 30CuCe-H and (b) 30CuCe-L.

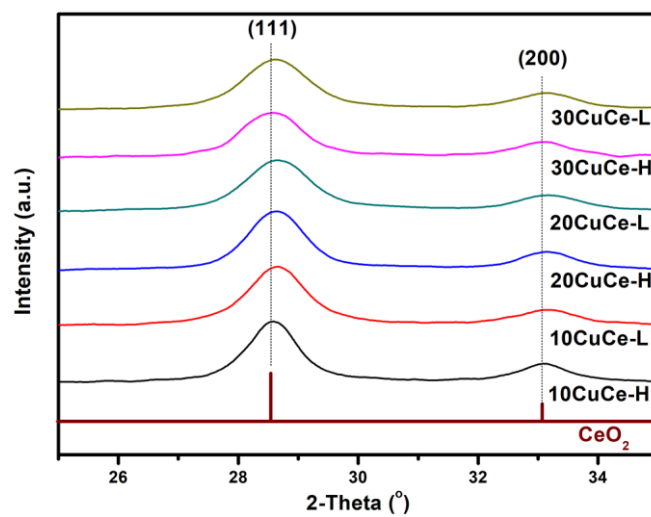

Figure S14 Enlarged XRD profiles of the as-prepared copper-ceria samples.

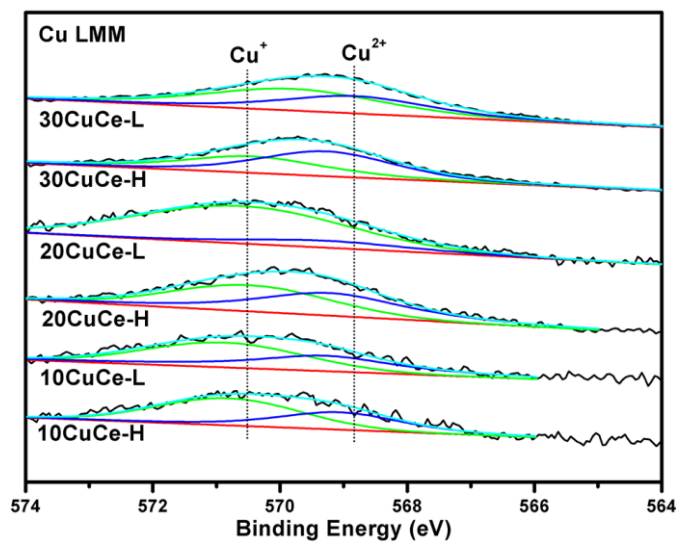

Figure S15 Cu-LMM spectra of the as-prepared copper-ceria samples.

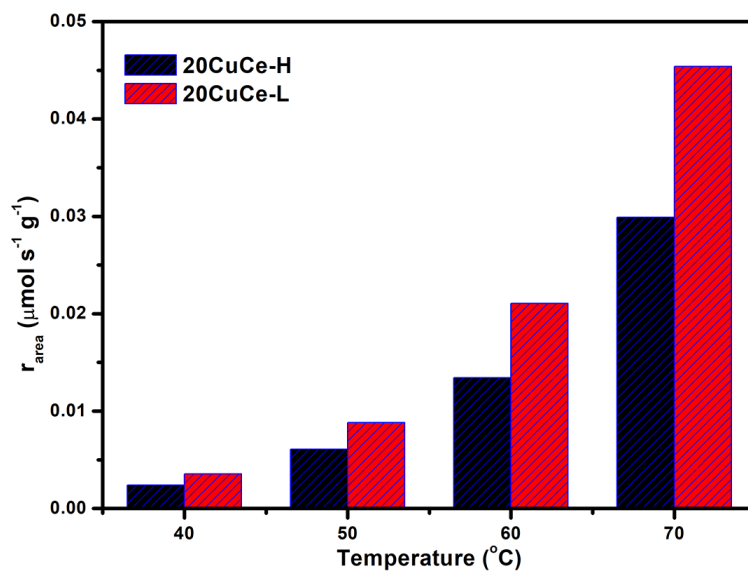

Figure S16 Area-normalized specific reaction rates of 20CuCe-H and 20CuCe-L.

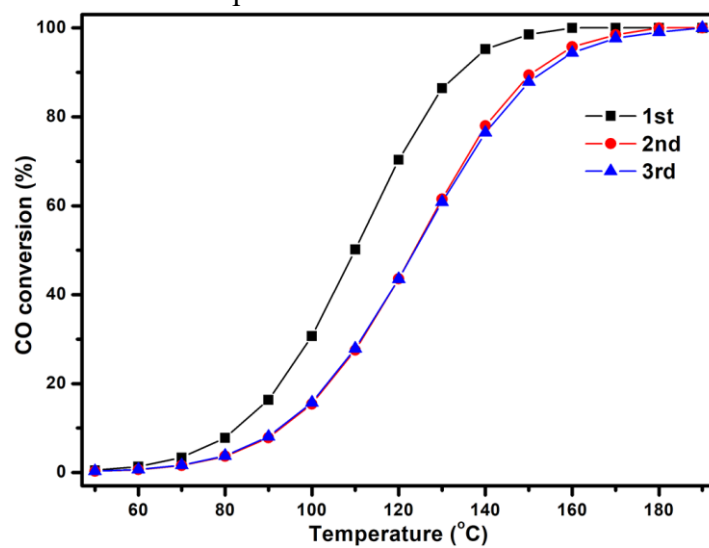

Figure S17 CO conversion as a function of temperature over 20CuCe-H in continuous three cycles.

Table S1 Catalytic activity of copper-ceria samples in references and our work.

| Samples                                                | T <sub>50</sub> (°C) | T <sub>100</sub> (°C) | Reference        |
|--------------------------------------------------------|----------------------|-----------------------|------------------|
| 20CuCe-L                                               | 83                   | 120                   | This work        |
| CuO(20)/CeO <sub>2</sub> -500                          | 101                  | 151                   | Ref <sup>1</sup> |
| CuO/Ce <sub>x</sub> Cu <sub>1-x</sub> O <sub>2-δ</sub> | 95                   | 135                   | Ref <sup>2</sup> |
| Cu <sup>2+</sup> doped CeO <sub>2</sub> (P4)           | 172                  | 223                   | Ref <sup>3</sup> |
| Cu <sub>0.1</sub> Ce <sub>0.9</sub> O <sub>2</sub>     | 234                  | 275                   | Ref <sup>4</sup> |
| Cu <sub>0.1</sub> Ce <sub>0.9</sub> O <sub>2</sub>     | 149                  | 196                   | Ref <sup>5</sup> |
| Cu <sub>0.29</sub> Ce <sub>0.71</sub> O <sub>2-y</sub> | 144                  | 203                   | Ref <sup>6</sup> |
| Cu <sub>0.05</sub> Ce <sub>0.95</sub> O <sub>2-δ</sub> | 94                   | 200                   | Ref <sup>7</sup> |

1. A.-P. Jia, S.-Y. Jiang, J.-Q. Lu and M.-F. Luo, *J. Phys. Chem. C*, 2010, **114**, 21605-21610.
2. A.-P. Jia, G.-S. Hu, L. Meng, Y.-L. Xie, J.-Q. Lu and M.-F. Luo, *J. Catal.* 2012, **289**, 199-209.
3. W. Liu, X. F. Liu, L. J. Feng, J. X. Guo, A. R. Xie, S. P. Wang, J. C. Zhang and Y. Z. Yang, *Nanoscale*, 2014, **6**, 10693-10700.
4. F. Yang, J. J. Wei, W. Liu, J. X. Guo and Y. Z. Yang, *J. Mater. Chem. A*, 2014, **2**, 5662-5667.
5. J. S. Elias, K. A. Stoerzinger, W. T. Hong, M. Risch, L. Giordano, A. N. Mansour and Y. Shao-Horn, *ACS Catal.*, 2017, **7**, 6843-6857.
6. C. D. Curran, L. Lu, C. J. Kiely and S. McIntosh, *J. Mater. Chem. A*, 2018, **6**, 244-255.



7. T. Cwele, N. Mahadevaiah, S. Singh and H. B. Friedrich, *Appl. Catal. B: Environ.*, 2016, **182**, 1-14.
